# Supplementary material for: A computational approach for genome-wide mapping of splicing factor binding sites
Source: Springer Nature journal article supplement (doi:10.1186/gb-2009-10-3-r30), 2009-03-18
Supplement: Additional file 1 [file gb-2009-10-3-r30-s1.pdf]

Table S1: List of splicing factors and splicing factor binding site motifs.

| Factor          | Motif      | Reference |
|-----------------|------------|-----------|
| PTB             | ucuu       | [53]      |
|                 | cucucu     | [35, 37]  |
| hnRNPA1         | uaggw      | [31]      |
|                 | uagaca     | [42]      |
|                 | uagagu     | [34]      |
| hnRNPAB         | auagca     | [40]      |
| hnRNPH/F        | uugggu     | [41]      |
|                 | uguggg     | [36]      |
|                 | ggcgg      | [45]      |
|                 | gggug      | [38]      |
| hnRNPG/Tra2beta | aaguguu    | [44]      |
| Tra2beta        | gaagaa     | [51]      |
|                 | ghvvganr   | [52]      |
| Tra2alpha       | gaagaggaag | [48]      |
| SC35            | gryymcyr   | [26]      |
|                 | ugcygyy    | [47]      |
| SF2/ASF         | crsmgsw    | [26]      |
|                 | ugrwgvh    | [46]      |
| SRp20           | cuckucy    | [32]      |
|                 | wcwwc      | [33]      |
| SRp40           | yywcwsg    | [26]      |
| SRp55           | yrckm      | [26]      |
| 9G8             | wggacra    | [32]      |
|                 | acgagagay  | [33]      |
| 9G8/SRp30c      | gacgac     | [33]      |
| CUG-BP          | ugcug      | [11, 50]  |
| FOX-1           | ugcaug     | [43]      |
| MBNL-1          | ygcukey    | [39]      |
| NOVA-1          | ycay       | [14]      |
| YB-1            | caaccaca   | [49]      |

Table S2 : Training results

| Motifs   | Estimator         | $cutoff^{sig}$ | $cutoff^{sub}$ | $w$ | Avg TPR | Sd TPR |
|----------|-------------------|----------------|----------------|-----|---------|--------|
| SFBS     | S                 | 0.01           | 0.025          | 50  | 0.681   | 0.038  |
| SFBS     | $COS(SS_w)$       | 0.01           | 0.025          | 50  | 0.597   | 0.173  |
| SFBS     | $COS(M_w)$        | 0.01           | 0.025          | 50  | 0.809   | 0.063  |
| SFBS     | $COS(WA_w)$       | 0.01           | 0.025          | 50  | 0.817   | 0.054  |
| SFBS     | $COS(WR_{w,a=2})$ | 0.01           | 0.025          | 50  | 0.929   | 0.016  |
| SFBS     | $COS(WR_{w,a=3})$ | 0.01           | 0.025          | 50  | 0.911   | 0.033  |
| SFBS     | $SS_w$            | 0.01           | 0.025          | 50  | 0.644   | 0.028  |
| SFBS     | $M_w$             | 0.01           | 0.025          | 50  | 0.755   | 0.061  |
| SFBS     | $WA_w$            | 0.01           | 0.025          | 50  | 0.788   | 0.049  |
| SFBS     | $WR_{w,a=2}$      | 0.01           | 0.025          | 50  | 0.894   | 0.037  |
| SFBS     | $WR_{w,a=3}$      | 0.01           | 0.025          | 50  | 0.892   | 0.041  |
| SFBS     | $COS(WR_{w,a=2})$ | 0.01           | 0.01           | 50  | 0.841   | 0.026  |
| SFBS     | $COS(WR_{w,a=2})$ | 0.01           | 0.05           | 50  | 0.870   | 0.052  |
| SFBS     | $COS(WR_{w,a=2})$ | 0.025          | 0.025          | 50  | 0.504   | 0.025  |
| SFBS     | $COS(WR_{w,a=2})$ | 0.01           | 0.025          | 10  | 0.838   | 0.031  |
| SFBS     | $COS(WR_{w,a=2})$ | 0.01           | 0.025          | 20  | 0.878   | 0.023  |
| SFBS     | $COS(WR_{w,a=2})$ | 0.01           | 0.025          | 40  | 0.890   | 0.023  |
| SFBS     | $COS(WR_{w,a=2})$ | 0.01           | 0.025          | 50  | 0.916   | 0.021  |
| SFBS     | $COS(WR_{w,a=2})$ | 0.01           | 0.025          | 60  | 0.919   | 0.028  |
| SFBS     | $COS(WR_{w,a=2})$ | 0.01           | 0.025          | 70  | 0.898   | 0.045  |
| SFBS     | $COS(WR_{w,a=2})$ | 0.01           | 0.025          | 80  | 0.894   | 0.055  |
| SFBS     | $COS(WR_{w,a=2})$ | 0.01           | 0.025          | 90  | 0.873   | 0.061  |
| SFBS     | $COS(WR_{w,a=2})$ | 0.01           | 0.025          | 100 | 0.860   | 0.055  |
| Promoter | $COS(WR_{w,a=2})$ | 0.01           | 0.025          | 50  | 0.593   | 0.025  |
| UTR      | $COS(WR_{w,a=2})$ | 0.01           | 0.025          | 50  | 0.550   | 0.012  |
| Promoter | $WR_{w,a=2}$      | 0.01           | 0.025          | 50  | 0.555   | 0.030  |
| UTR      | $WR_{w,a=3}$      | 0.01           | 0.025          | 50  | 0.566   | 0.043  |

Summary of training results. The average percent of true positives (%TP) (100 iterations) at a fixed false positive rate of 1% when training the data with different multiplicity estimators: Weighted Rank (WR), Weighted Average (WA), Median (M), Sum of Score (SS), with and without the COS function in comparison to the Single Score (S). In addition, tests were conducted with variable parameters: window size ( $w$ ), significant cutoff ( $cutoff^{sig}$ ), suboptimal cutoff ( $cutoff^{sub}$ ) and a values (only for WR). As a control, we trained the data with UTR and promoter motifs instead of SFBS.

Table S3: Thresholds used for COS(WR)

| factor               | Query      | Cutoff Exon | Cutoff Intron | Cutoff ext. Exon | Cutoff Mixed |
|----------------------|------------|-------------|---------------|------------------|--------------|
| PTB                  | ucuu       | 0.749       | 0.781         | 0.828            | 0.747        |
|                      | cucucu     | 0.666       | 0.689         | 0.729            | 0.667        |
| hnRNP A1             | uagggw     | 0.583       | 0.5           | 0.584            | 0.583        |
|                      | uagaca     | 0.583       | 0.5           | 0.584            | 0.544        |
|                      | uagagu     | 0.602       | 0.616         | 0.642            | 0.602        |
| hnRNP AB             | auagca     | 0.583       | 0.5           | 0.5835           | 0.544        |
| hnRNP H/F            | uugggu     | 0.5         | 0.465         | 0.6              | 0.5          |
|                      | uguggg     | 0.514       | 0.514         | 0.6              | 0.514        |
|                      | ggcgg      | 0.583       | 0.545         | 0.584            | 0.583        |
|                      | gggug      | 0.5         | 0.5           | 0.583            | 0.5          |
| hnRNP G/Tra2 $\beta$ | aaguguu    | 0.357       | 0.357         | 0.357            | 0.357        |
| Tra2 $\beta$         | gaagaa     | 0.729       | 0.584         | 0.749            | 0.667        |
|                      | ghvvganr   | 0.775       | 0.675         | 0.825            | 0.737        |
| Tra2 $\alpha$        | gaagaggaag | 0.612       | 0.5           | 0.6485           | 0.575        |
| SC35                 | gryymcyr   | 0.6         | 0.45          | 0.65             | 0.594        |
|                      | ugcyggy    | 0.616       | 0.545         | 0.659            | 0.591        |
| SF2/ASF              | crsmgsw    | 0.681       | 0.583         | 0.727            | 0.639        |
|                      | ugrwgvh    | 0.748       | 0.607         | 0.761            | 0.688        |
| SRp20                | cuckucy    | 0.625       | 0.66          | 0.6895           | 0.625        |
|                      | wcwwc      | 0.714       | 0.643         | 0.75             | 0.643        |
| SRp40                | yywcwsg    | 0.681       | 0.6           | 0.722            | 0.639        |
| SRp55                | yrckm      | 0.748       | 0.621         | 0.714            | 0.68         |
| 9G8                  | wggacra    | 0.485       | 0.396         | 0.544            | 0.468        |
|                      | acgagagay  | 0.625       | 0.5           | 0.656            | 0.583        |
| 9G8/SRp30c           | gacgac     | 0.5         | 0.334         | 0.5105           | 0.5          |
| CUG-BP               | ugcug      | 0.6         | 0.411         | 0.6              | 0.5          |
| FOX-1                | ugcaug     | 0.593       | 0.544         | 0.625            | 0.583        |
| MBNL-1               | ycuky      | 0.668       | 0.639         | 0.736            | 0.639        |
| NOVA-1               | ycay       | 0.812       | 0.708         | 0.854            | 0.75         |
| YB-1                 | caaccacaa  | 0.573       | 0.473         | 0.594            | 0.539        |

Table S4: Enrichment of SFBSs in alternative exons

| SF                  | SFBS       | Alternative Acceptor |        |        |           | Cassette Exon |        |           | Alternative Donor |        |        |           |
|---------------------|------------|----------------------|--------|--------|-----------|---------------|--------|-----------|-------------------|--------|--------|-----------|
|                     |            | 5' Intron            | Ex/Int | Exon   | 3' Intron | 5' Intron     | Exon   | 3' Intron | 5' Intron         | Exon   | Ex/Int | 3' Intron |
| PTB                 | ucuu       | -2.341               | 5.823  | -2.215 | -1.033    | 1.761         | 4.872  | -2.42     | -2.459            | -2.585 | -0.727 | 3.34      |
|                     | cucucu     | -2.294               | 1.743  | -2.33  | -2.181    | -0.775        | 8.106  | -1.221    | -2.131            | -2.501 | -1.771 | 2.474     |
|                     | uagggw     | -1.127               | -1.689 | -1.184 | -2.074    | -2.218        | 13.279 | -2.329    | -1.725            | -0.771 | 1.131  | -0.377    |
| hnRNP A1            | uagaca     | -2.742               | -2.549 | -1.074 | -2.336    | -2.774        | 2.91   | -2.93     | -2.949            | -2.6   | -1.975 | 0.527     |
|                     | uagagu     | -0.343               | -1.858 | -1.393 | -1.495    | -0.044        | 4.64   | -2.195    | -2.151            | -2.232 | -0.89  | -0.538    |
| hnRNP AB            | auagca     | -3.166               | -2.762 | -2.933 | -2.868    | -2.58         | 3.66   | -2.85     | -2.958            | -1.63  | -2.158 | -1.503    |
|                     | uugggu     | 0.282                | -0.763 | -2.637 | -2.301    | 4.466         | 5.318  | 1.669     | -1.076            | -2.516 | -1.606 | 3.162     |
| hnRNP H/F           | uguggg     | 0.515                | 0.971  | -1.578 | -2.26     | -1.246        | 3.97   | -0.548    | -0.857            | -2.282 | 2.427  | 0.554     |
|                     | ggcgg      | -0.465               | -0.4   | -1.609 | -2.064    | -1.479        | 4.657  | 0.857     | -1.146            | -0.509 | 0.257  | -0.163    |
|                     | gggug      | 1.538                | -1.642 | -2.244 | -1.995    | -1.916        | 6.802  | -2.018    | -2.046            | -2.439 | -0.149 | -1.331    |
| hnRNP G/Tra $\beta$ | aaguguu    | -0.971               | 6.934  | -2.575 | -2.832    | -1.124        | 7.865  | -1.742    | -2.687            | -1.345 | 6.268  | -0.072    |
| Tra2 $\beta$        | gaagaa     | -1.599               | -2.173 | -0.825 | -2.247    | -2.274        | 2.155  | -1.614    | -1.477            | -1.705 | 0.013  | -1.139    |
|                     | ghvvganr   | -1.522               | -3.015 | 1.151  | -2.387    | -3.236        | 3.954  | -3.226    | -2.986            | -2.181 | 0.448  | -3.029    |
| Tra2 $\alpha$       | gaagaggaag | -1.992               | -2.432 | -0.489 | -1.425    | -2.412        | 0.468  | -2.219    | -2.315            | -1.186 | 0.311  | -1.685    |
| SC35                | gryymcyr   | -0.368               | 2.242  | 0.385  | -2.127    | -2.169        | 7.833  | -1.521    | -1.541            | -0.876 | 1.133  | -1.242    |
|                     | ugcygyy    | 1.3                  | 1.518  | -0.694 | -1.97     | -0.381        | 1.69   | 0.95      | -0.719            | -2.066 | -0.518 | -1.322    |
| SF2/ASF             | crsmgsw    | -1.067               | -3.197 | 0.484  | -3.32     | -3.51         | 8.199  | -3.383    | -2.5              | -1.738 | -2.017 | -2.666    |
|                     | ugrwgvh    | -2.167               | -2.769 | -3.286 | -3.687    | -3.944        | -0.768 | -2.033    | -3.299            | -3.275 | -2.706 | -1.01     |
| SRp20               | cuckucy    | -2.588               | 7.334  | -0.117 | -2.326    | 5.011         | 6.388  | -1.267    | -1.97             | -2.552 | -1.791 | -0.612    |
|                     | wcwwc      | -2.799               | 2.445  | -0.76  | -1.757    | -0.162        | 6.584  | 2.802     | -2.762            | -1.11  | -0.569 | -0.541    |
| SRp40               | yywcwsg    | -1.717               | 0.478  | -2.259 | -1.986    | -2.516        | 5.52   | -2.023    | -2.608            | -2.388 | -0.187 | -0.157    |
| SRp55               | yrckm      | -2.374               | -0.955 | -1.096 | -2.733    | -2.293        | 0.097  | -2.006    | -1.388            | -1.514 | -2.386 | -1.815    |
| 9G8                 | wggacra    | -2.312               | -2.514 | -2.599 | -2.505    | -2.506        | 3.904  | -2.426    | -2.297            | -1.186 | 1.135  | -1.576    |
|                     | acgagagay  | -1.911               | -2.076 | -0.517 | -2.081    | -2.23         | 5.25   | -0.4      | -1.621            | -1.396 | 4.178  | -1.659    |
| 9G8/SRp30c          | gacgac     | -2.213               | -1.532 | 0.96   | -2.52     | -2.999        | 1.444  | -2.863    | -2.06             | -1.099 | 1.372  | -0.401    |
| CUG-BP              | ugcug      | -1.982               | 1.511  | -2.514 | -3.701    | -0.435        | 1.128  | 2.449     | -2.901            | -3.028 | 0.302  | -0.483    |
| FOX-1               | ugcaug     | -1.86                | -1.123 | -1.034 | -2.848    | -2.063        | 0.496  | 1.779     | -2.77             | -1.66  | -2.091 | 0.602     |
| MBNL-1              | ygcky      | -0.289               | 0.904  | -0.681 | -2.242    | 1.315         | 2.349  | 2.512     | -1.967            | -1.754 | 0.45   | 0.78      |
| NOVA-1              | ycay       | -2.28                | 1.422  | -1.359 | -2.496    | 0.252         | 2.143  | 0.328     | -1.946            | -1.56  | 1.434  | 3.029     |
| YB-1                | caaccacaa  | -1.501               | -0.075 | 1.183  | -1.689    | -1.491        | 4.336  | -1.712    | -1.806            | -1.048 | 1.192  | -1.629    |

Enrichment of SFBSs in alternative exons. The table displays details of the Wilcoxon tests, comparing the normalized density of SFBSs in Cassette Exons (CE), Alternative Acceptors (AA) and Alternative Donors (AD) to a background of Constitutive Exons. The tests were carried out for the exonic and intronic sequences separately. p-values were corrected with the Westfall-Young procedure. The numbers correspond to the Westfall-Young corrected  $-\log(p\text{-value})$  of the Wilcoxon test.

Table S5: Enrichment of SFBSs in alternative exons applying Single Scores (S)

| SF                  | SFBS       | Alternative Acceptor |        |        |           | Cassette Exon |        |           | Alternative Donor |        |        |           |
|---------------------|------------|----------------------|--------|--------|-----------|---------------|--------|-----------|-------------------|--------|--------|-----------|
|                     |            | 5' Intron            | Ex/Int | Exon   | 3' Intron | 5' Intron     | Exon   | 3' Intron | 5' Intron         | Exon   | Ex/Int | 3' Intron |
| PTB                 | ucuu       | -2.531               | 1.533  | -1.917 | -2.477    | 2.187         | 6.974  | -2.261    | -2.608            | -2.03  | 0.775  | -2.148    |
|                     | cucucu     | 0.888                | -2.362 | -2.091 | -2.191    | -0.333        | -1.067 | -2.303    | -2.315            | -2.664 | -2.681 | -2.647    |
|                     | uagggw     | -2.32                | -1.719 | -2.356 | -2.119    | -2.355        | -2.313 | -2.27     | -2.263            | -2.325 | -2.379 | -2.283    |
| hnRNP A1            | uagaca     | -2.979               | -2.298 | -3.031 | -3.003    | -3.011        | -2.389 | -2.616    | -2.921            | -2.961 | -3.147 | -2.945    |
|                     | uagagu     | -2.241               | -2.396 | -2.361 | -2.27     | -2.293        | -2.177 | -2.306    | -2.414            | -2.356 | -1.094 | -2.191    |
| hnRNP AB            | auagca     | -3.051               | -1.927 | -3.203 | -3.08     | -3.117        | -1.832 | -2.699    | -3.03             | -2.918 | -2.895 | -3.037    |
|                     | uugggu     | -2.665               | -2.695 | -2.221 | -2.617    | -2.644        | -1.519 | -2.453    | -2.608            | -2.682 | -2.729 | -1.56     |
| hnRNP H/F           | uguggg     | -1.848               | -1.137 | -2.094 | -2.423    | -1.907        | -1.44  | -2.139    | -2.338            | -2.433 | -0.63  | -1.861    |
|                     | ggcgg      | -1.902               | -1.767 | -1.907 | -2.487    | -1.319        | 0.13   | -2.215    | -1.727            | 0.622  | -1.014 | -1.554    |
|                     | gggug      | -0.8                 | 0.156  | -2.249 | -1.694    | -2.172        | 0.54   | -2.389    | -2.571            | -2.675 | -0.59  | -1.543    |
| hnRNP G/Tra $\beta$ | aaguguu    | -2.685               | -2.341 | -2.015 | -2.688    | -2.699        | -2.716 | -2.157    | -2.652            | -2.875 | -0.858 | 0.548     |
| Tra2 $\beta$        | gaagaa     | -2.291               | -2.13  | 0.658  | -1.657    | -2.33         | 0.14   | -2.188    | -2.252            | -1.687 | -1.572 | -2.055    |
|                     | ghvvganr   | -3.171               | -2.227 | -1.901 | -3.149    | -3.226        | 3.8    | -3.051    | -2.648            | -2.662 | 0.721  | -3.216    |
| Tra2 $\alpha$       | gaagaggaag | -2.579               | -2.579 | -2.248 | -2.579    | -2.579        | -2.035 | -2.579    | -2.579            | -2.579 | -2.579 | -2.579    |
| SC35                | grymcyr    | -2.044               | -1.698 | -1.73  | -1.016    | -2.215        | -1.551 | -1.778    | -1.463            | -1.985 | -1.468 | -1.685    |
|                     | ugcygyy    | -1.84                | -0.378 | -0.743 | -1.778    | -1.707        | -0.261 | -0.839    | -2.542            | -2.327 | -2.603 | -2.287    |
| SF2/ASF             | crsmgw     | -3.492               | -3.908 | -2.285 | -3.916    | -3.431        | -0.876 | -2.645    | -3.456            | -2.353 | -1.973 | -3.193    |
|                     | ugrwgvh    | -2.944               | -3.239 | -3.119 | -3.571    | -3.972        | 0.729  | -3.346    | -3.193            | -3.527 | -2.49  | -3.923    |
| SRp20               | cuckucy    | -3.105               | -0.439 | -3.057 | -2.886    | -2.259        | -1.782 | -2.457    | -2.843            | -3.115 | -2.86  | -3.029    |
|                     | wcwwc      | -3.086               | 1.204  | -2.324 | -2.493    | -1.715        | 0.57   | -2.177    | -2.949            | -2.28  | 0.242  | -1.669    |
| SRp40               | yywcwsg    | -2.802               | -1.453 | -1.869 | -2.631    | -2.815        | 3.118  | -2.84     | -2.826            | -1.774 | -0.851 | -0.51     |
| SRp55               | yrckm      | -3.013               | -0.421 | 2.532  | -2.966    | -2.99         | 2.481  | -2.686    | -2.638            | -2.609 | -1.536 | -2.71     |
| 9G8                 | wggacra    | -2.599               | -2.523 | -2.2   | -2.415    | -2.599        | -2.344 | -1.714    | -2.599            | -2.284 | -0.74  | -2.394    |
|                     | acgagagay  | -2.25                | -2.25  | -2.25  | -2.25     | -2.25         | -2.25  | -2.25     | -2.25             | -2.25  | -2.25  | -2.25     |
| 9G8/SRp30c          | gacgac     | -3.033               | -3.033 | -2.869 | -3.033    | -2.887        | -2.026 | -3.033    | -2.88             | -2.843 | -3.033 | -3.033    |
| CUG-BP              | ugcug      | -3.209               | -0.701 | -1.684 | -1.888    | -3.127        | -0.822 | -1.097    | -3.673            | -3.379 | -3.138 | -3.47     |
| FOX-1               | ugcaug     | -2.9                 | -2.979 | -2.85  | -2.925    | -1.838        | -2.525 | -1.457    | -2.873            | -2.874 | -3.001 | -2.921    |
| MBNL-1              | ygckuy     | -0.822               | 1.604  | 0.876  | -1.731    | 1.821         | 2.21   | -0.135    | -1.652            | -1.483 | -2.147 | -1.617    |
| NOVA-1              | ycay       | -2.555               | 5.164  | -1.679 | -2.453    | -0.798        | 1.099  | -1.584    | -2.283            | -2.246 | 2.691  | -1.585    |
| YB-1                | caaccacaa  | -2.153               | -2.153 | -2.153 | -2.153    | -2.153        | -1.989 | -2.153    | -2.153            | -2.153 | -2.153 | -2.153    |

Enrichment of SFBSs in alternative exons when applying Single Scores (S). The table displays details of the Wilcoxon tests, comparing the normalized density of SFBSs in Cassette Exons (CE), Alternative Acceptors (AA), and Alternative Donors (AD) to a background of Constitutive Exons. The tests were carried out for the exonic and intronic sequences separately. p-values were corrected with the Westfall-Young procedure. The numbers correspond to the Westfall-Young corrected  $-\log(p\text{-value})$  of the Wilcoxon test.

Table S6: Tissue specificity index (TSI) of the splicing factors

| Splicing Factor | type            | TSI   |
|-----------------|-----------------|-------|
| 9G8             | Mixed           | 0.676 |
| CUGBP1          | Mixed           | 0.272 |
| FOX1            | Sink            | 0.624 |
| hnRNPG          | Source          | 0.388 |
| HNRPA1          | Mixed           | 0.302 |
| HNRPAB          | Sink            | 0.505 |
| HNRPF           | Extended        | 0.566 |
| HNRPH3          | Mixed           | 0.502 |
| MBNL1           | Sink            | 0.775 |
| NOVA1           | Self Regulation | 0.958 |
| PTBP1*          | Source          | 0.356 |
| SC35            | Mixed           | 0.288 |
| SF2/ASF         | Source          | 0.486 |
| SRp20           | Extended        | 0.296 |
| SRp30c          | Extended        | 0.254 |
| SRp40           | Mixed           | 0.353 |
| SRp55           | Source          | 0.345 |
| Tra2 $\beta$    | Sink            | 0.522 |
| Tra2 $\alpha$   | Extended        | 0.546 |
| YB1             | Extended        | 0.235 |

\*Only in the core network

Table S7: Details of predicted SF to SF interactions from the network

| Factor                                         | Target       | Hit Position | Event Type | Coordinates                | 5' UTR | ORF | 3' UTR | Description                                     |
|------------------------------------------------|--------------|--------------|------------|----------------------------|--------|-----|--------|-------------------------------------------------|
| hnRNPH/F                                       | 9G8          | 5' Exon      | CE         | chr2:38826789-38826825:-   | 0      | 1   | 0      | SR motif affected                               |
| SRp40                                          | 9G8          | E            | IR         | chr2:38829224-38829299:-   | 0      | 1   | 0      | SR motif affected                               |
| hnRNPH/F                                       | FOX1         | 5' Exon      | CE         | chr22:34482097-34482137:-  | 0      | 1   | 0      |                                                 |
| hnRNPA1                                        | FOX1         | E            | AA         | chr22:34507591-34507739:-  | 0      | 1   | 0      | Single amino acid variation                     |
| CUG-BP,SC35,SRp55                              | FOX1         | E            | IR         | chr22:34472465-34472554:-  | 0      | 1   | 0      | NMD candidate                                   |
| hnRNPH/F                                       | FOX1         | 5' Exon      | IR         | chr22:34472465-34472554:-  | 0      | 1   | 0      | NMD candidate                                   |
| hnRNPH/F                                       | hnRNPA1      | E            | CE         | chr12:52963129-52963285:+  | 0      | 1   | 0      | G-rich sequence affected                        |
| 9G8,SRp30c,hnRNPA1,SRp55                       | hnRNPA1      | E            | CE         | chr5:177569738-177569879:+ | 0      | 1   | 0      | G-rich sequence affected                        |
| SC35                                           | hnRNPA1      | 5' Exon      | CE         | chr5:177569738-177569879:+ | 0      | 1   | 0      | G-rich sequence affected                        |
| hnRNPG                                         | hnRNPH3      | 3' Exon      | IR         | chr10:69766961-69767096:+  | 1      | 1   | 0      | RRM motif affected                              |
| hnRNPH/F                                       | hnRNPH3      | 5' Exon      | IR         | chr10:69767620-69767759:+  | 1      | 1   | 0      | RRM motif affected                              |
| hnRNPH/F                                       | hnRNPH3      | 3' Exon      | IR         | chr10:69767620-69767759:+  | 1      | 1   | 0      | RRM motif affected                              |
| SRp55                                          | MBNL1        | E            | CE         | chr3:153633195-153633399:+ | 0      | 1   | 0      |                                                 |
| MBNL                                           | MBNL1        | 5' Exon      | CE,ME      | chr3:153535589-153535709:+ | 1      | 0   | 0      |                                                 |
| CUG-BP                                         | MBNL1        | E            | CE         | chr3:153658608-153658672:+ | 0      | 1   | 0      | Affects carboxyl end of the protein             |
| YB1                                            | MBNL1        | E            | CE         | chr3:153656020-153656056:+ | 0      | 1   | 0      |                                                 |
| MBNL                                           | MBNL1        | 5' Exon      | CE         | chr3:153647182-153647236:+ | 0      | 1   | 0      |                                                 |
| MBNL                                           | MBNL1        | 5' Exon      | CE         | chr3:153648098-153648252:+ | 0      | 1   | 0      |                                                 |
| YB1                                            | MBNL1        | E            | CE         | chr3:153656745-153656840:+ | 0      | 1   | 0      |                                                 |
| NOVA1                                          | NOVA1        | 3' Exon      | CE         | chr14:26011365-26011437:-  | 0      | 1   | 0      | Affects the distance between KH domains         |
| NOVA1,SRp20                                    | NOVA1        | E            | CE         | chr14:26011365-26011437:-  | 0      | 1   | 0      | Affects the distance between KH domains         |
| PTB,YB1                                        | PTBP1        | E            | CE         | chr19:758868-758902:+      | 0      | 1   | 0      | RRM motif affected                              |
| SRp20,                                         | PTBP1        | 5' Exon      | CE         | chr19:758868-758902:+      | 0      | 1   | 0      | RRM motif affected                              |
| hnRNPA1,hnRNPH/F,SC35,SF2ASF,SRp55             | SC35         | E            | CE,AD,IR   | chr17:72244475-72244503:-  | 0      | 1   | 0      | G-rich and SR affected                          |
| SC35                                           | SC35         | 5' Exon      | CE,AD,IR   | chr17:72244475-72244503:-  | 0      | 1   | 0      | G-rich and SR affected                          |
| hnRNPA1                                        | SRp40        | E            | IR         | chr14:69305651-69305721:+  | 0      | 1   | 1      | Affects the distance between RRM. NMD candidate |
| PTB                                            | SRp40        | 5' Exon      | IR         | chr14:69306936-69307010:+  | 1      | 1   | 0      |                                                 |
| 9G8,SRp30c,hnRNPH/F,Tra2 $\beta$ ,Tra2 $\beta$ | Tra2 $\beta$ | E            | CE         | chr3:187119918-187119978:- | 0      | 1   | 0      | G-rich sequence affected                        |

Details of predicted SF to SF interactions from the network. The table shows details regarding the target predicted regulators, the position of the predicted hit (exonic, intronic), the type of alternative exon (CE= cassette exons, AA= alternative acceptors, AD= alternative donors, MS= mutual exclusive exon, IR= intron retention), the genomic positions of the target (hg18), the portion of the transcript affected by alternative splicing (UTRs and ORFs), and a short description of the effect of the alternative splicing event of the target.

Table S8: Background model calculated for single score S

| factor        | query      | Exon  |        | Intron |         | Mixed |        |
|---------------|------------|-------|--------|--------|---------|-------|--------|
| PTB           | ucuu       | 0.235 | ±0.221 | 0.256  | ±0.2275 | 0.254 | ±0.228 |
|               | cucucu     | 0.242 | ±0.211 | 0.246  | ±0.206  | 0.245 | ±0.205 |
| hnRNP A1      | uagggw     | 0.276 | ±0.174 | 0.276  | ±0.1765 | 0.276 | ±0.177 |
|               | uagaca     | 0.26  | ±0.177 | 0.2585 | ±0.179  | 0.259 | ±0.179 |
|               | uagagu     | 0.254 | ±0.174 | 0.2585 | ±0.1765 | 0.258 | ±0.176 |
| hnRNP AB      | auagca     | 0.26  | ±0.179 | 0.2585 | ±0.1775 | 0.259 | ±0.178 |
| hnRNP H/F     | uugggu     | 0.243 | ±0.171 | 0.252  | ±0.1755 | 0.25  | ±0.176 |
|               | uguggg     | 0.246 | ±0.179 | 0.247  | ±0.181  | 0.246 | ±0.181 |
|               | ggcgg      | 0.248 | ±0.191 | 0.2335 | ±0.1895 | 0.234 | ±0.191 |
|               | gggug      | 0.248 | ±0.193 | 0.2425 | ±0.195  | 0.242 | ±0.195 |
| hnRNP G/Tra2β | aaguguu    | 0.251 | ±0.166 | 0.2595 | ±0.1675 | 0.259 | ±0.167 |
| Tra2β         | gaagaa     | 0.27  | ±0.197 | 0.262  | ±0.1925 | 0.263 | ±0.193 |
|               | ghvvganr   | 0.462 | ±0.167 | 0.4495 | ±0.1665 | 0.45  | ±0.167 |
| Tra2α         | gaagaggaag | 0.265 | ±0.153 | 0.2555 | ±0.1505 | 0.256 | ±0.15  |
| SC35          | gryymcyr   | 0.396 | ±0.174 | 0.3905 | ±0.171  | 0.391 | ±0.171 |
|               | ugcygyy    | 0.305 | ±0.189 | 0.3085 | ±0.1835 | 0.308 | ±0.184 |
| SF2/ASF       | crsmgw     | 0.388 | ±0.179 | 0.375  | ±0.177  | 0.376 | ±0.177 |
|               | ugrwgvh    | 0.378 | ±0.2   | 0.3785 | ±0.194  | 0.378 | ±0.193 |
| SRp20         | cuckucy    | 0.276 | ±0.173 | 0.283  | ±0.175  | 0.282 | ±0.176 |
|               | wcwwc      | 0.355 | ±0.214 | 0.359  | ±0.209  | 0.359 | ±0.209 |
| SRp40         | yywcwsg    | 0.381 | ±0.183 | 0.382  | ±0.181  | 0.382 | ±0.182 |
| SRp55         | yrckm      | 0.428 | ±0.193 | 0.422  | ±0.1905 | 0.422 | ±0.191 |
| 9G8           | wggacra    | 0.303 | ±0.179 | 0.295  | ±0.1745 | 0.296 | ±0.175 |
|               | acgagagay  | 0.275 | ±0.146 | 0.2675 | ±0.1455 | 0.268 | ±0.146 |
| 9G8/SRp30c    | gacgac     | 0.255 | ±0.176 | 0.2445 | ±0.17   | 0.245 | ±0.17  |
| CUG-BP        | ugcug      | 0.235 | ±0.179 | 0.2445 | ±0.183  | 0.244 | ±0.184 |
| FOX-1         | ugcaug     | 0.248 | ±0.187 | 0.2505 | ±0.1835 | 0.25  | ±0.183 |
| MBNL-1        | ygcukey    | 0.318 | ±0.202 | 0.3255 | ±0.198  | 0.325 | ±0.198 |
| NOVA-1        | ycay       | 0.328 | ±0.237 | 0.3285 | ±0.2355 | 0.329 | ±0.236 |
| YB-1          | caaccacaa  | 0.259 | ±0.15  | 0.251  | ±0.1485 | 0.253 | ±0.149 |
